# Supplementary material for: Predicting fluorescence to singlet oxygen generation quantum yield ratio for BODIPY dyes using QSPR and machine learning
Source: Royal Society of Chemistry journal article supplement (doi:10.1039/d4cp02471k), 2024-01-01
Supplement: d4cp02471k1.pdf [file d4cp02471k1.pdf]

Supporting Information for

**Predicting Fluorescence to Singlet Oxygen Generation Quantum Yield  
Ratio for BODIPY Dyes Using QSPR and Machine Learning**

Platon P. Chebotaev,<sup>a</sup> Andrey A. Buglak,<sup>a,b\*</sup> Aimee Sheehan,<sup>c</sup> Mikhail A. Filatov<sup>c\*</sup>

<sup>a</sup> Faculty of Physics, Saint-Petersburg State University, Universiteteskaya Emb. 7-9, 199034 St. Petersburg, Russia. E-mail: andreybuglak@gmail.com

<sup>b</sup> Institute of Physics, Kazan Federal University, 18 Kremlyovskaya street, 420008, Kazan, Russia

<sup>c</sup> School of Chemical and Biopharmaceutical Sciences, Technological University Dublin, City Campus, Grangegorman, Dublin 7, Ireland. E-mail: mikhail.filatov@tudublin.ie

**Table S1.** BODIPY dataset.

| Structure                                                                                | Solvent                         | $\Phi_{\Delta}$ | $\Phi_{\text{Fl}}$ | Comment      | Reference |
|------------------------------------------------------------------------------------------|---------------------------------|-----------------|--------------------|--------------|-----------|
| 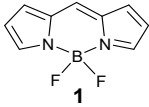<br>1   | hexane                          | 0.066           | 0.92               |              | 1         |
|                                                                                          | toluene                         | 0.12            | 0.79               |              | 1         |
|                                                                                          | THF                             | 0.071           | 0.86               |              | 1         |
|                                                                                          | MeOH                            | 0.083           | 0.96               |              | 1         |
| <br>2   | hexane                          | 0.03            | 0.78               |              | 2         |
|                                                                                          | toluene                         | 0.061           | 0.74               |              | 2         |
|                                                                                          | CCl <sub>4</sub>                | 0.100           | 0.81               |              | 2         |
|                                                                                          | CH <sub>2</sub> Cl <sub>2</sub> | 0.062           | 0.74               |              | 2         |
|                                                                                          | THF                             | 0.091           | -                  | Not reported | 2         |
|                                                                                          | EtOH                            | 0.058           | 0.8                |              | 2         |
|                                                                                          | CH <sub>3</sub> CN              | 0.069           | 0.81               |              | 2         |
| <br>3   | hexane                          | 0.038           | 0.56               |              | 3         |
|                                                                                          | toluene                         | 0.023           |                    |              | 4         |
|                                                                                          | EtOAc                           | 0.052           | 0.58               |              | 3         |
|                                                                                          | THF                             | 0.13            | 0.56               |              | 4         |
|                                                                                          | pinacolone                      | 0.11            | 0.55               |              | 3         |
|                                                                                          | acetone                         | 0.050           | 0.46               |              | 3         |
|                                                                                          | EtOH                            | 0.030           | -                  | Not reported | 4         |
|                                                                                          | MeOH                            | 0.031           | 0.58               |              | 3         |
| CH <sub>3</sub> CN                                                                       | 0.017                           | 0.52            |                    | 4            |           |
| <br>4 | hexane                          | 0.018           | 0.023              |              | 3         |
|                                                                                          | EtOAc                           | 0.027           | 0.016              |              | 3         |
|                                                                                          | THF                             | 0.026           | 0.05               |              | 3         |
|                                                                                          | pinacolone                      | 0.079           | 0.0064             |              | 3         |
|                                                                                          | acetone                         | 0.051           | 0.0038             |              | 3         |
|                                                                                          | MeOH                            | 0.0083          | 0.027              |              | 3         |
|                                                                                          | CH <sub>3</sub> CN              | 0.020           | 0.0032             |              | 3         |
| <br>5 | hexane                          | 0.01            | 0.42               |              | 3         |
|                                                                                          | EtOAc                           | 0.031           | 0.23               |              | 3         |
|                                                                                          | THF                             | 0.028           | 0.25               |              | 3         |
|                                                                                          | pinacolone                      | 0.07            | 0.074              |              | 3         |
|                                                                                          | acetone                         | 0.029           | 0.07               |              | 3         |
|                                                                                          | MeOH                            | 0.0062          | 0.14               |              | 3         |
|                                                                                          | CH <sub>3</sub> CN              | 0.0044          | 0.019              |              | 3         |
| <br>6 | hexane                          | 0.0067          | 0.19               |              | 3         |
|                                                                                          | EtOAc                           | 0.021           | 0.14               |              | 3         |
|                                                                                          | THF                             | 0.019           | 0.11               |              | 3         |
|                                                                                          | pinacolone                      | 0.047           | 0.047              |              | 3         |
|                                                                                          | acetone                         | 0.0093          | 0.027              |              | 3         |
|                                                                                          | MeOH                            | 0.0036          | 0.03               |              | 3         |
|                                                                                          | CH <sub>3</sub> CN              | 0.0043          | 0.015              |              | 3         |
| <br>7 | hexane                          | 0.021           | 0.033              |              | 3         |
|                                                                                          | EtOAc                           | 0.026           | 0.025              |              | 3         |
|                                                                                          | THF                             | 0.026           | 0.0087             |              | 3         |
|                                                                                          | pinacolone                      | 0.073           | 0.012              |              | 3         |
|                                                                                          | acetone                         | 0.012           | 0.0091             |              | 3         |
|                                                                                          | MeOH                            | 0.0055          | 0.045              |              | 3         |

|                                                                                           |                    |        |        |  |   |
|-------------------------------------------------------------------------------------------|--------------------|--------|--------|--|---|
|                                                                                           | CH <sub>3</sub> CN | 0.0049 | 0.0033 |  | 3 |
| <br>8    | hexane             | 0.0052 | 0.059  |  | 3 |
|                                                                                           | EtOAc              | 0.0039 | 0.062  |  | 3 |
|                                                                                           | THF                | 0.012  | 0.061  |  | 3 |
|                                                                                           | pinacolone         | 0.012  | 0.04   |  | 3 |
|                                                                                           | acetone            | 0.012  | 0.049  |  | 3 |
|                                                                                           | MeOH               | 0.013  | 0.071  |  | 3 |
|                                                                                           | CH <sub>3</sub> CN | 0.024  | 0.038  |  | 3 |
| <br>9    | hexane             | 0.0091 | 0.25   |  | 3 |
|                                                                                           | EtOAc              | 0.032  | 0.38   |  | 3 |
|                                                                                           | THF                | 0.024  | 0.33   |  | 3 |
|                                                                                           | pinacolone         | 0.020  | 0.17   |  | 3 |
|                                                                                           | acetone            | 0.031  | 0.2    |  | 3 |
|                                                                                           | MeOH               | 0.012  | 0.12   |  | 3 |
|                                                                                           | CH <sub>3</sub> CN | 0.037  | 0.13   |  | 3 |
| <br>10   | hexane             | 0.029  | 0.98   |  | 5 |
|                                                                                           | EtOAc              | 0.057  | 0.76   |  | 5 |
|                                                                                           | THF                | 0.061  | 0.87   |  | 5 |
|                                                                                           | pinacolone         | 0.078  | 0.74   |  | 5 |
|                                                                                           | acetone            | 0.17   | 0.78   |  | 5 |
|                                                                                           | MeOH               | 0.021  | 0.69   |  | 5 |
|                                                                                           | CH <sub>3</sub> CN | 0.18   | 0.57   |  | 5 |
| <br>11  | hexane             | 0.040  | 0.71   |  | 5 |
|                                                                                           | EtOAc              | 0.073  | 0.47   |  | 5 |
|                                                                                           | THF                | 0.051  | 0.64   |  | 5 |
|                                                                                           | pinacolone         | 0.081  | 0.64   |  | 5 |
|                                                                                           | acetone            | 0.082  | 0.72   |  | 5 |
|                                                                                           | MeOH               | 0.036  | 0.58   |  | 5 |
|                                                                                           | CH <sub>3</sub> CN | 0.18   | 0.54   |  | 5 |
| <br>12 | hexane             | 0.026  | 0.971  |  | 6 |
|                                                                                           | EtOAc              | 0.178  | 0.499  |  | 6 |
|                                                                                           | THF                | 0.462  | 0.457  |  | 6 |
|                                                                                           | pinacolone         | 0.680  | 0.481  |  | 6 |
|                                                                                           | acetone            | 0.250  | 0.059  |  | 6 |
|                                                                                           | MeOH               | 0.023  | 0.037  |  | 6 |
|                                                                                           | CH <sub>3</sub> CN | 0.125  | 0.01   |  | 6 |
| <br>13 | hexane             | 0.114  | 0.863  |  | 6 |
|                                                                                           | EtOAc              | 0.291  | 0.004  |  | 6 |
|                                                                                           | THF                | 0.357  | 0.005  |  | 6 |
|                                                                                           | pinacolone         | 0.392  | 0.004  |  | 6 |
|                                                                                           | acetone            | 0.068  | 0.003  |  | 6 |
|                                                                                           | MeOH               | 0.004  | 0.003  |  | 6 |
|                                                                                           | CH <sub>3</sub> CN | 0.033  | 0.001  |  | 6 |
| <br>14 | hexane             | 0.024  | 0.95   |  | 5 |
|                                                                                           | EtOAc              | 0.063  | 0.64   |  | 5 |
|                                                                                           | THF                | 0.059  | 0.78   |  | 5 |
|                                                                                           | pinacolone         | 0.16   | 0.69   |  | 5 |
|                                                                                           | acetone            | 0.11   | 0.8    |  | 5 |
|                                                                                           | MeOH               | 0.074  | 0.68   |  | 5 |
|                                                                                           | CH <sub>3</sub> CN | 0.31   | 0.55   |  | 5 |
|        | hexane             | 0.102  | 0.441  |  | 7 |
|                                                                                           | EtOAc              | 0.412  | 0.011  |  | 7 |
|                                                                                           | THF                | 0.623  | 0.014  |  | 7 |
|                                                                                           | pinacolone         | 0.490  | 0.015  |  | 7 |
|                                                                                           | acetone            | 0.114  | 0.009  |  | 7 |

|                                                                                                      |                    |       |       |  |   |
|------------------------------------------------------------------------------------------------------|--------------------|-------|-------|--|---|
|                                                                                                      | MeOH               | 0.073 | 0.003 |  | 7 |
|                                                                                                      | CH <sub>3</sub> CN | 0.062 | 0.005 |  | 7 |
| 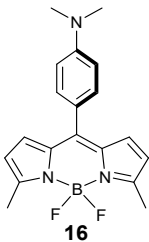 <p><b>16</b></p>   | hexane             | 0.23  | 0.376 |  | 7 |
|                                                                                                      | EtOAc              | 0.171 | 0.013 |  | 7 |
|                                                                                                      | THF                | 0.321 | 0.011 |  | 7 |
|                                                                                                      | pinacolone         | 0.439 | 0.024 |  | 7 |
|                                                                                                      | acetone            | 0.087 | 0.006 |  | 7 |
|                                                                                                      | MeOH               | 0.019 | 0.03  |  | 7 |
|                                                                                                      | CH <sub>3</sub> CN | 0.052 | 0.008 |  | 7 |
|  <p><b>17</b></p>   | hexane             | 0.058 | 0.384 |  | 7 |
|                                                                                                      | EtOAc              | 0.511 | 0.006 |  | 7 |
|                                                                                                      | THF                | 0.612 | 0.008 |  | 7 |
|                                                                                                      | pinacolone         | 0.644 | 0.024 |  | 7 |
|                                                                                                      | acetone            | 0.145 | 0.002 |  | 7 |
|                                                                                                      | MeOH               | 0.037 | 0.01  |  | 7 |
|                                                                                                      | CH <sub>3</sub> CN | 0.083 | 0.005 |  | 7 |
|  <p><b>18</b></p>  | hexane             | 0.258 | 0.341 |  | 7 |
|                                                                                                      | EtOAc              | 0.220 | 0.005 |  | 7 |
|                                                                                                      | THF                | 0.401 | 0.008 |  | 7 |
|                                                                                                      | pinacolone         | 0.457 | 0.004 |  | 7 |
|                                                                                                      | acetone            | 0.099 | 0.002 |  | 7 |
|                                                                                                      | MeOH               | 0.046 | 0.003 |  | 7 |
|                                                                                                      | CH <sub>3</sub> CN | 0.057 | 0.002 |  | 7 |
|  <p><b>19</b></p> | hexane             | 0.120 | 0.45  |  | 7 |
|                                                                                                      | EtOAc              | 0.676 | 0.029 |  | 7 |
|                                                                                                      | THF                | 0.535 | 0.011 |  | 7 |
|                                                                                                      | pinacolone         | 0.588 | 0.063 |  | 7 |
|                                                                                                      | acetone            | 0.192 | 0.001 |  | 7 |
|                                                                                                      | MeOH               | 0.038 | 0.002 |  | 7 |
|                                                                                                      | CH <sub>3</sub> CN | 0.083 | 0.001 |  | 7 |
|  <p><b>20</b></p> | hexane             | 0.225 | 0.388 |  | 7 |
|                                                                                                      | EtOAc              | 0.290 | 0.008 |  | 7 |
|                                                                                                      | THF                | 0.338 | 0.004 |  | 7 |
|                                                                                                      | pinacolone         | 0.281 | 0.002 |  | 7 |
|                                                                                                      | acetone            | 0.100 | 0.002 |  | 7 |
|                                                                                                      | MeOH               | 0.008 | 0.005 |  | 7 |
|                                                                                                      | CH <sub>3</sub> CN | 0.033 | 0.02  |  | 7 |
|  <p><b>21</b></p> | hexane             | 0.05  | 0.87  |  | 4 |
|                                                                                                      | toluene            | 0.043 | 0.77  |  | 4 |
|                                                                                                      | THF                | 0.13  | 0.85  |  | 4 |
|                                                                                                      | EtOH               | 0.041 | 0.9   |  | 4 |
|                                                                                                      | CH <sub>3</sub> CN | 0.057 | 0.83  |  | 4 |
|  <p><b>22</b></p> | hexane             | 0.011 | 0.906 |  | 6 |
|                                                                                                      | EtOAc              | 0.165 | 0.411 |  | 6 |
|                                                                                                      | THF                | 0.232 | 0.438 |  | 6 |
|                                                                                                      | pinacolone         | 0.460 | 0.479 |  | 6 |
|                                                                                                      | acetone            | 0.471 | 0.389 |  | 6 |
|                                                                                                      | MeOH               | 0.274 | 0.648 |  | 6 |

|                                                                                           |                     |       |       |              |     |
|-------------------------------------------------------------------------------------------|---------------------|-------|-------|--------------|-----|
|                                                                                           | <chem>CC#N</chem>   | 0.872 | 0.123 |              | 6   |
| 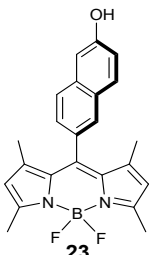<br>23   | hexane              | 0.047 | 0.637 |              | 6   |
|                                                                                           | EtOAc               | 0.104 | 0.695 |              | 6   |
|                                                                                           | THF                 | 0.442 | 0.581 |              | 6   |
|                                                                                           | pinacolone          | 0.382 | 0.621 |              | 6   |
|                                                                                           | acetone             | 0.111 | 0.483 |              | 6   |
|                                                                                           | MeOH                | 0.131 | 0.11  |              | 6   |
|                                                                                           | <chem>CC#N</chem>   | 0.081 | 0.118 |              | 6   |
| <br>24   | hexane              | 0.116 | 0.269 |              | 6   |
|                                                                                           | EtOAc               | 0.106 | 0.129 |              | 6   |
|                                                                                           | THF                 | 0.19  | 0.167 |              | 6   |
|                                                                                           | pinacolone          | 0.317 | 0.11  |              | 6   |
|                                                                                           | acetone             | 0.070 | 0.101 |              | 6   |
|                                                                                           | MeOH                | 0.046 | 0.03  |              | 6   |
|                                                                                           | <chem>CC#N</chem>   | 0.011 | 0.092 |              | 6   |
| <br>25   | hexane              | n.d.  | 0.92  |              | 2   |
|                                                                                           | toluene             | 0.066 | -     | Not Reported | 2   |
|                                                                                           | <chem>CCl4</chem>   | 0.15  | -     | Not Reported | 2   |
|                                                                                           | <chem>CH2Cl2</chem> | 0.20  | 0.3   |              | 2   |
|                                                                                           | THF                 | 0.15  | 0.7   |              | 2   |
|                                                                                           | EtOH                | 0.30  | 0.42  |              | 2   |
|                                                                                           | <chem>CC#N</chem>   | 0.084 | 0.45  |              | 2   |
| <br>26 | hexane              | 0.066 | 0.92  |              | 2   |
|                                                                                           | toluene             | 0.038 | 0.86  |              | 2   |
|                                                                                           | <chem>CCl4</chem>   | 0.061 | -     | Not Reported | 2   |
|                                                                                           | <chem>CH2Cl2</chem> | 0.068 | 0.89  |              | 2   |
|                                                                                           | THF                 | 0.066 | 0.79  |              | 2   |
|                                                                                           | EtOH                | 0.18  | 0.81  |              | 2   |
|                                                                                           | <chem>CC#N</chem>   | 0.092 | 0.57  |              | 2   |
| <br>27 | hexane              | 0.01  | 0.99  |              | 8   |
|                                                                                           | toluene             | 0.045 | 0.92  |              | 4,8 |
|                                                                                           | THF                 | 0.21  | 0.36  |              | 4   |
|                                                                                           | EtOH                | 0.53  | 0.038 |              | 8   |
|                                                                                           | <chem>CC#N</chem>   | 0.22  | 0.009 |              | 4   |
| <br>28 | hexane              | 0.04  | 0.9   |              | 8   |
|                                                                                           | toluene             | 0.10  | 0.81  |              | 9   |
|                                                                                           | EtOH                | 0.59  | 0.02  |              | 8   |
|                                                                                           | <chem>CC#N</chem>   | 0.84  | 0.01  |              | 9,8 |
| <br>29 | toluene             | 0.20  | 0.39  |              | 9   |
|                                                                                           | <chem>CH2Cl2</chem> | 0.24  | 0.1   |              | 9   |
|                                                                                           | <chem>CC#N</chem>   | 0.11  | 0.01  |              | 9   |
| <br>30 | toluene             | 0.11  | 0.42  |              | 9   |
|                                                                                           | <chem>CH2Cl2</chem> | 0.13  | 0.2   |              | 9   |
|                                                                                           | <chem>CC#N</chem>   | 0.05  | 0.04  |              | 9   |

|                                                                                                  |                                 |       |        |              |    |
|--------------------------------------------------------------------------------------------------|---------------------------------|-------|--------|--------------|----|
| 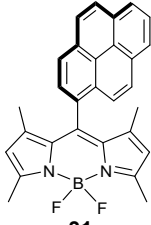<br><b>31</b>   | hexane                          | 0.01  | 0.967  |              | 10 |
|                                                                                                  | toluene                         | 0.086 | 0.83   |              | 4  |
|                                                                                                  | THF                             | 0.20  | 0.94   |              | 4  |
|                                                                                                  | EtOH                            | 0.34  | 0.651  |              | 10 |
|                                                                                                  | CH <sub>3</sub> CN              | 0.34  | 0.59   |              | 4  |
| <br><b>32</b>   | hexane                          | 0.1   | 0.381  |              | 11 |
|                                                                                                  | toluene                         | 0.31  | 0.067  |              | 12 |
| <br><b>33</b>   | toluene                         | 0.18  | 0.619  |              | 11 |
|                                                                                                  | THF                             | 0.21  | 0.082  |              | 11 |
|                                                                                                  | CH <sub>2</sub> Cl <sub>2</sub> | 0.42  | 0.037  |              | 11 |
|                                                                                                  | CH <sub>3</sub> CN              | 0.11  | 0.017  |              | 11 |
| <br><b>34</b>  | hexane                          | 0.349 | -      | Not reported | 13 |
|                                                                                                  | toluene                         | 0.673 | -      | Not reported | 13 |
|                                                                                                  | CH <sub>2</sub> Cl <sub>2</sub> | 0.013 | -      | Not reported | 13 |
| <br><b>35</b> | hexane                          | 0.018 | -      | Not reported | 13 |
|                                                                                                  | toluene                         | 0.246 | -      | Not reported | 13 |
| <br><b>36</b> | hexane                          | 0.28  | -      | Not reliable | 14 |
|                                                                                                  | toluene                         | 0.08  | -      | Not reliable | 14 |
| <br><b>37</b> | toluene                         | 0.02  | 0.0004 |              | 14 |

|                                                                                                  |             |       |        |              |    |
|--------------------------------------------------------------------------------------------------|-------------|-------|--------|--------------|----|
| 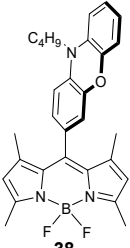<br><b>38</b>   | hexane      | 0.11  | 0.155  |              | 14 |
|                                                                                                  | toluene     | 0.42  | -      | Not reliable | 14 |
| <br><b>39</b>   | toluene     | 0.23  | 0.393  |              | 15 |
| <br><b>40</b>  | hexane      | 0.05  | 0.354  |              | 15 |
|                                                                                                  | toluene     | 0.18  | 0.018  |              | 15 |
| <br><b>41</b> | hexane      | 0.01  | 0.303  |              | 14 |
|                                                                                                  | toluene     | 0.39  | 0.019  |              | 14 |
| <br><b>42</b> | hexane      | 0.02  | 0.16   |              | 14 |
|                                                                                                  | toluene     | 0.04  | 0.033  |              | 14 |
| <br><b>43</b> | toluene     | 0.01  | 0.0012 |              | 16 |
|                                                                                                  | THF         | 0.003 | -      | Not reported | 16 |
| <br><b>44</b> | cyclohexane | 0.04  | -      | Not reported | 16 |
|                                                                                                  | toluene     | 0.014 | 0.001  |              | 16 |
|                                                                                                  | THF         | 0.006 | -      | Not reported | 16 |

|                                                                                                                                  |                                 |       |        |              |    |
|----------------------------------------------------------------------------------------------------------------------------------|---------------------------------|-------|--------|--------------|----|
| 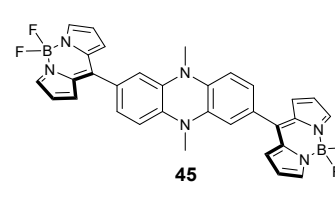 <p style="text-align: center;"><b>45</b></p>    | toluene                         | 0.001 | 0.005  |              | 16 |
|                                                                                                                                  | THF                             | 0.008 | -      | Not reported | 16 |
|                                                                                                                                  | CH <sub>3</sub> CN              | 0.009 | -      | Not reported | 16 |
|  <p style="text-align: center;"><b>46</b></p>   | cyclohexane                     | 0.30  | -      | Not reported | 16 |
|                                                                                                                                  | toluene                         | 0.05  | 0.0013 |              | 16 |
|                                                                                                                                  | THF                             | 0.004 | -      | Not reported | 16 |
|  <p style="text-align: center;"><b>47</b></p>   | toluene                         | 0.033 | 0.2    |              | 17 |
|                                                                                                                                  | CH <sub>2</sub> Cl <sub>2</sub> | 0.58  | 0.04   |              | 17 |
|                                                                                                                                  | CH <sub>3</sub> CN              | 0.024 | -      | Not reported | 17 |
|  <p style="text-align: center;"><b>48</b></p>  | toluene                         | 0.023 | 0.83   |              | 17 |
|                                                                                                                                  | CH <sub>2</sub> Cl <sub>2</sub> | 0.082 | 0.72   |              | 17 |
|                                                                                                                                  | CH <sub>3</sub> CN              | 0.54  | 0.18   |              | 17 |
|  <p style="text-align: center;"><b>49</b></p> | toluene                         | 0.083 | 0.38   |              | 17 |
|                                                                                                                                  | CH <sub>2</sub> Cl <sub>2</sub> | 0.026 | 0.15   |              | 17 |
|  <p style="text-align: center;"><b>50</b></p> | toluene                         | 0.09  | 0.82   |              | 18 |
|  <p style="text-align: center;"><b>51</b></p> | toluene                         | 0.11  | 0.81   |              | 18 |
|  <p style="text-align: center;"><b>52</b></p> | toluene                         | 0.19  | 0.31   |              | 18 |
|  <p style="text-align: center;"><b>53</b></p> | toluene                         | 0.32  | 0.09   |              | 18 |
|  <p style="text-align: center;"><b>58</b></p> | toluene                         | 0.02  | 0.59   |              | 17 |
|                                                                                                                                  | CH <sub>2</sub> Cl <sub>2</sub> | 0.043 | 0.52   |              | 17 |



|                                                                                                      |                                 |      |       |  |    |
|------------------------------------------------------------------------------------------------------|---------------------------------|------|-------|--|----|
| 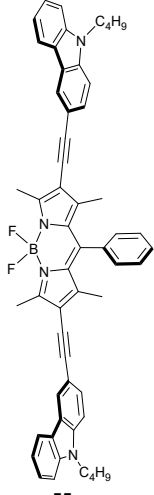 <p><b>55</b></p>   | hexane                          | 0.03 | 0.462 |  | 15 |
|                                                                                                      | toluene                         | 0.04 | 0.36  |  | 15 |
|  <p><b>56</b></p>  | Hexane                          | 0.04 | 0.484 |  | 15 |
|                                                                                                      | toluene                         | 0.12 | 0.299 |  | 15 |
|  <p><b>57</b></p> | toluene                         | 0.4  | 0.71  |  | 19 |
|                                                                                                      | CH <sub>2</sub> Cl <sub>2</sub> | 0.5  | 0.56  |  | 19 |
|  <p><b>58</b></p> | toluene                         | 0.4  | 0.67  |  | 19 |
|                                                                                                      | CH <sub>2</sub> Cl <sub>2</sub> | 0.5  | 0.6   |  | 19 |
|  <p><b>59</b></p> | toluene                         | 0.3  | 0.69  |  | 19 |
|                                                                                                      | CH <sub>2</sub> Cl <sub>2</sub> | 0.5  | 0.62  |  | 19 |
|  <p><b>60</b></p> | toluene                         | 0.3  | 0.76  |  | 19 |

|                                                                                           |                                 |       |       |              |    |
|-------------------------------------------------------------------------------------------|---------------------------------|-------|-------|--------------|----|
|                                                                                           | CH <sub>2</sub> Cl <sub>2</sub> | 0.5   | 0.63  |              | 19 |
| 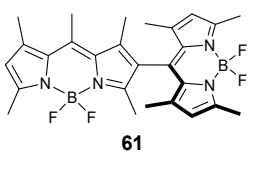<br>61   | toluene                         | 0.24  | 0.804 |              | 20 |
|                                                                                           | CHCl <sub>3</sub>               | 0.75  | 0.22  |              | 21 |
|                                                                                           | THF                             | 0.86  | 0.17  |              | 21 |
|                                                                                           | CH <sub>2</sub> Cl <sub>2</sub> | 0.64  | -     | Not reported | 20 |
|                                                                                           | acetone                         | 0.5   | 0.84  |              | 21 |
|                                                                                           | CH <sub>3</sub> CN              | 0.25  | 0.01  |              | 21 |
| <br>62   | toluene                         | 0.44  | 0.033 |              | 20 |
|                                                                                           | CH <sub>2</sub> Cl <sub>2</sub> | 0.20  | -     | Not reported | 20 |
| <br>63   | toluene                         | 0.144 | 0.628 |              | 20 |
|                                                                                           | CH <sub>2</sub> Cl <sub>2</sub> | 0.68  | -     | Not reported | 20 |
|                                                                                           | CH <sub>3</sub> CN              | 0.112 | 0.001 |              | 20 |
| <br>64   | toluene                         | 0.01  | 0.573 |              | 20 |
|                                                                                           | CH <sub>2</sub> Cl <sub>2</sub> | 0.09  | -     | Not reported | 20 |
|                                                                                           | CH <sub>3</sub> CN              | 0.03  | 0.007 |              | 20 |
| <br>65 | Hexane                          | -     | 0.123 | Not reported | 22 |
|                                                                                           | toluene                         | 0.071 | 0.265 |              | 22 |
|                                                                                           | CH <sub>2</sub> Cl <sub>2</sub> | 0.12  | 0.205 |              | 22 |
|                                                                                           | THF                             | -     | 0.187 | Not reported | 22 |
|                                                                                           | CH <sub>3</sub> CN              | -     | 0.013 | Not reported | 22 |
| <br>66 | Hexane                          | 0.065 | 0.096 |              | 22 |
|                                                                                           | toluene                         | 0.33  | 0.121 |              | 22 |
|                                                                                           | CH <sub>2</sub> Cl <sub>2</sub> | 0.12  | 0.027 |              | 22 |
|                                                                                           | THF                             | 0.061 | 0.021 |              | 22 |
|                                                                                           | CH <sub>3</sub> CN              | -     | 0.003 | Not reported | 22 |
| <br>67 | Hexane                          | 0.12  | 0.173 |              | 22 |
|                                                                                           | toluene                         | 0.37  | 0.166 |              | 22 |
|                                                                                           | CH <sub>2</sub> Cl <sub>2</sub> | 0.25  | 0.062 |              | 22 |
|                                                                                           | THF                             | 0.089 | 0.05  |              | 22 |
|                                                                                           | CH <sub>3</sub> CN              | 0.027 | 0.008 |              | 22 |
| <br>68 | Hexane                          | 0.023 | 0.077 |              | 22 |
|                                                                                           | toluene                         | 0.011 | 0.025 |              | 22 |
|                                                                                           | CH <sub>2</sub> Cl <sub>2</sub> | -     | 0.004 | Not reported | 22 |
|                                                                                           | THF                             | -     | 0.003 | Not reported | 22 |
|                                                                                           | CH <sub>3</sub> CN              | 0.005 | 0.002 |              | 22 |
|        | Hexane                          | 0.22  | 0.617 |              | 23 |
|                                                                                           | toluene                         | 0.289 | 0.513 |              | 23 |
|                                                                                           | THF                             | 0.307 | 0.291 |              | 23 |
|                                                                                           | CH <sub>2</sub> Cl <sub>2</sub> | -     | 0.207 | Not reported | 23 |

|                                                                                           |                                 |       |        |              |    |
|-------------------------------------------------------------------------------------------|---------------------------------|-------|--------|--------------|----|
| 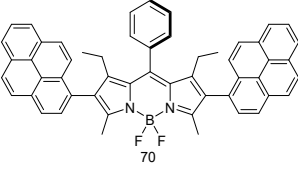<br>70   | EtOH                            | 0.299 | 0.094  |              | 23 |
|                                                                                           | CH <sub>3</sub> CN              | 0.14  | 0.025  |              | 23 |
|                                                                                           | Hexane                          | 0.18  | 0.676  |              | 23 |
|                                                                                           | toluene                         | 0.203 | 0.634  |              | 23 |
|                                                                                           | THF                             | 0.185 | 0.445  |              | 23 |
|                                                                                           | CH <sub>2</sub> Cl <sub>2</sub> | -     | 0.352  | Not reported | 23 |
|                                                                                           | EtOH                            | 0.19  | 0.191  |              | 23 |
| CH <sub>3</sub> CN                                                                        | 0.09                            | 0.078 |        | 23           |    |
| <br>71   | Hexane                          | 0.007 | 0.028  |              | 24 |
|                                                                                           | toluene                         | 0.046 | 0.039  |              | 24 |
|                                                                                           | CH <sub>2</sub> Cl <sub>2</sub> | 0.441 | 0.019  |              | 24 |
|                                                                                           | CH <sub>3</sub> CN              | 0.175 | 0.0001 |              | 24 |
| <br>72   | Hexane                          | -     | 0.023  | Not reported | 24 |
|                                                                                           | toluene                         | 0.026 | 0.028  |              | 24 |
|                                                                                           | CH <sub>2</sub> Cl <sub>2</sub> | 0.012 | 0.031  |              | 24 |
|                                                                                           | CH <sub>3</sub> CN              | 0.026 | 0.020  |              | 24 |
| <br>73  | Hexane                          | 0.026 | 0.001  |              | 25 |
|                                                                                           | toluene                         | 0.058 | 0.0009 |              | 25 |
|                                                                                           | CH <sub>2</sub> Cl <sub>2</sub> | 0.028 | 0.0002 |              | 25 |
|                                                                                           | CH <sub>3</sub> CN              | 0.023 | -      | Not Reported | 25 |
| <br>74 | Hexane                          | -     | 0.696  | Not Reported | 25 |
|                                                                                           | toluene                         | -     | 0.74   | Not Reported | 25 |
|                                                                                           | CH <sub>2</sub> Cl <sub>2</sub> | -     | 0.723  | Not Reported | 25 |
|                                                                                           | CH <sub>3</sub> CN              | 0.055 | 0.644  | Not Reported | 25 |

**Table S2.** Statistical parameters of the best performing QSPR models for BODIPYs in toluene obtained with MLR, SVR and RFR method.

| Parameter        | MLR   | SVR   | RFR   |
|------------------|-------|-------|-------|
| $R_{train}^2$    | 0.863 | 0.845 | 0.839 |
| $RMSE_{train}$   | 0.280 | 0.281 | 0.304 |
| $R_{adjusted}^2$ | 0.829 | 0.806 | 0.798 |
| $q^2$            | 0.771 | 0.793 | 0.556 |

**Table S3.** Values of the descriptor used by Model 2 (SVR, toluene).

| Compound               | VE1_RG | $\frac{Lg \Phi_{Fl}}{Lg \Phi_{\Delta}}$ |
|------------------------|--------|-----------------------------------------|
| BDP-1                  | 3.739  | 0.108                                   |
| BDP-2 <sup>test</sup>  | 4.153  | 0.228                                   |
| BDP-21                 | 3.961  | 0.111                                   |
| BDP-26                 | 3.915  | 0.153                                   |
| BDP-27                 | 3.816  | 0.374                                   |
| BDP-28                 | 3.700  | 1.618                                   |
| BDP-29                 | 4.205  | 0.121                                   |
| BDP-30                 | 3.635  | 1.460                                   |
| BDP-31 <sup>test</sup> | 3.925  | 0.049                                   |
| BDP-32                 | 5.25   | 2.218                                   |
| BDP-33                 | 3.867  | 0.046                                   |
| BDP-37                 | 3.008  | 1.060                                   |
| BDP-39 <sup>test</sup> | 2.943  | 0.083                                   |
| BDP-40                 | 3.016  | 0.308                                   |
| BDP-42 <sup>test</sup> | 3.110  | 0.240                                   |
| BDP-43                 | 3.771  | 0.082                                   |
| BDP-44                 | 3.945  | 0.705                                   |
| BDP-45                 | 3.774  | 0.437                                   |
| BDP-46                 | 5.043  | 0.076                                   |
| BDP-47 <sup>test</sup> | 3.039  | 0.135                                   |
| BDP-48                 | 2.964  | 0.472                                   |

|                        |       |       |
|------------------------|-------|-------|
| BDP-49                 | 3.845 | 0.095 |
| BDP-50                 | 3.790 | 0.393 |
| BDP-51                 | 3.736 | 0.767 |
| BDP-52                 | 2.543 | 0.389 |
| BDP-53 <sup>test</sup> | 3.521 | 0.569 |
| BDP-54                 | 3.708 | 1.054 |
| BDP-55                 | 3.116 | 0.280 |
| BDP-56                 | 3.231 | 0.585 |
| BDP-57 <sup>test</sup> | 4.230 | 0.317 |
| BDP-58                 | 4.273 | 2.113 |
| BDP-59                 | 3.700 | 0.027 |
| BDP-60                 | 5.169 | 0.635 |
| BDP-61                 | 4.056 | 0.980 |
| BDP-63                 | 2.512 | 2.000 |
| BDP-64                 | 3.952 | 2.343 |
| BDP-65                 | 3.435 | 0.286 |
| BDP-66 <sup>test</sup> | 3.462 | 0.092 |
| BDP-67                 | 3.520 | 0.538 |
| BDP-68                 | 3.439 | 0.502 |
| BDP-69                 | 3.302 | 2.308 |
| BDP-70 <sup>test</sup> | 2.766 | 1.905 |
| BDP-71                 | 3.733 | 0.818 |
| BDP-72                 | 3.769 | 1.806 |
| BDP-73                 | 5.754 | 2.463 |

---

**Table S4.** Most significant descriptors of Model 3 (toluene, RFR).

| <b>Compound</b>        | <b>ATSC4e</b> | <b>TDB01e</b> | $\frac{Lg \Phi_{Fl}}{Lg \Phi_{\Delta}}$ |
|------------------------|---------------|---------------|-----------------------------------------|
| BDP-1                  | 0.4766        | 1.352         | 0.108                                   |
| BDP-2 <sup>test</sup>  | 0.2636        | 1.303         | 0.228                                   |
| BDP-21                 | 0.2131        | 1.296         | 0.111                                   |
| BDP-26                 | 0.3993        | 1.32          | 0.153                                   |
| BDP-27                 | 0.2332        | 1.296         | 0.374                                   |
| BDP-28                 | 0.2635        | 1.292         | 1.618                                   |
| BDP-29                 | 0.2519        | 1.292         | 0.121                                   |
| BDP-30                 | 0.2564        | 1.292         | 1.460                                   |
| BDP-31 <sup>test</sup> | 0.2284        | 1.301         | 0.049                                   |
| BDP-32                 | 0.2012        | 1.32          | 2.218                                   |
| BDP-33                 | 0.2421        | 1.301         | 0.046                                   |
| BDP-37                 | 0.3406        | 1.319         | 1.060                                   |
| BDP-39 <sup>test</sup> | 0.4071        | 1.298         | 0.083                                   |
| BDP-40                 | 0.3874        | 1.308         | 0.308                                   |
| BDP-42 <sup>test</sup> | 0.3682        | 1.303         | 0.240                                   |
| BDP-43                 | 0.3268        | 1.332         | 0.082                                   |
| BDP-44                 | 0.2794        | 1.31          | 0.705                                   |
| BDP-45                 | 0.7844        | 1.349         | 0.437                                   |
| BDP-46                 | 0.4533        | 1.315         | 0.076                                   |
| BDP-47 <sup>test</sup> | 0.2759        | 1.306         | 0.135                                   |
| BDP-48                 | 0.3333        | 1.29          | 0.472                                   |
| BDP-49                 | 0.3052        | 1.296         | 0.095                                   |
| BDP-50                 | 0.3033        | 1.296         | 0.393                                   |
| BDP-51                 | 0.4015        | 1.297         | 0.767                                   |
| BDP-52                 | 0.4386        | 1.29          | 0.389                                   |
| BDP-53 <sup>test</sup> | 0.4141        | 1.321         | 0.569                                   |
| BDP-54                 | 0.3203        | 1.296         | 1.054                                   |
| BDP-55                 | 0.4717        | 1.285         | 0.280                                   |
| BDP-56                 | 0.612         | 1.292         | 0.585                                   |

|                        |        |       |       |
|------------------------|--------|-------|-------|
| BDP-57 <sup>test</sup> | 0.3469 | 1.298 | 0.317 |
| BDP-58                 | 0.5153 | 1.289 | 2.113 |
| BDP-59                 | 0.5681 | 1.281 | 0.027 |
| BDP-60                 | 0.4435 | 1.282 | 0.635 |
| BDP-61                 | 0.5342 | 1.311 | 0.980 |
| BDP-63                 | 0.5007 | 1.312 | 2.000 |
| BDP-64                 | 0.4591 | 1.308 | 2.343 |
| BDP-65                 | 0.1555 | 1.308 | 0.286 |
| BDP-66 <sup>test</sup> | 0.1463 | 1.309 | 0.092 |
| BDP-67                 | 0.1769 | 1.302 | 0.538 |
| BDP-68                 | 0.2564 | 1.301 | 0.502 |
| BDP-69                 | 0.3185 | 1.286 | 2.308 |
| BDP-70 <sup>test</sup> | 0.314  | 1.292 | 1.905 |
| BDP-71                 | 0.336  | 1.328 | 0.818 |
| BDP-72                 | 0.2738 | 1.322 | 1.806 |
| BDP-73                 | 0.1584 | 1.301 | 2.463 |

**Table S5.** Statistical parameters of the models for BODIPYs in acetonitrile.

| Parameter        | MLR   | SVR   | RFR   |
|------------------|-------|-------|-------|
| $R_{train}^2$    | 0.753 | 0.732 | 0.784 |
| $RMSE_{train}$   | 0.466 | 0.482 | 0.436 |
| $R_{adjusted}^2$ | 0.677 | 0.651 | 0.718 |
| $q^2$            | 0.563 | 0.483 | 0.528 |

**Table S6.** Most significant molecular descriptors of Model 4 (acetonitrile, MLR).

| Compound | VE1sign_G/D | VE2sign_G/D | F01[C-N] | $\frac{Lg \Phi_{Fl}}{Lg \Phi_{\Delta}}$ |
|----------|-------------|-------------|----------|-----------------------------------------|
| BDP-2    | 0.005       | 0.00015     | 4        | 0.079                                   |
| BDP-3    | 0.216       | 0.00501     | 4        | 0.160                                   |
| BDP-4    | 0.173       | 0.00385     | 5        | 1.468                                   |

|                        |       |         |   |       |
|------------------------|-------|---------|---|-------|
| BDP-5 <sup>test</sup>  | 0.221 | 0.00490 | 5 | 0.730 |
| BDP-6                  | 0.229 | 0.00510 | 5 | 0.771 |
| BDP-7                  | 0.185 | 0.00395 | 6 | 1.074 |
| BDP-8 <sup>test</sup>  | 0.214 | 0.00510 | 6 | 0.877 |
| BDP-9                  | 0.200 | 0.00476 | 6 | 0.619 |
| BDP-10                 | 0.225 | 0.00480 | 4 | 0.328 |
| BDP-11                 | 0.227 | 0.00446 | 4 | 0.359 |
| BDP-12                 | 0.272 | 0.00533 | 4 | 2.215 |
| BDP-13 <sup>test</sup> | 0.281 | 0.00511 | 4 | 2.025 |
| BDP-14                 | 0.282 | 0.00514 | 4 | 0.510 |
| BDP-15                 | 0.315 | 0.00618 | 7 | 1.905 |
| BDP-16 <sup>test</sup> | 0.075 | 0.00167 | 7 | 1.633 |
| BDP-17                 | 0.351 | 0.00604 | 7 | 2.129 |
| BDP-18                 | 0.109 | 0.00209 | 7 | 2.169 |
| BDP-19                 | 0.333 | 0.00595 | 7 | 2.775 |
| BDP-20 <sup>test</sup> | 0.101 | 0.00201 | 7 | 1.147 |
| BDP-21                 | 0.181 | 0.00370 | 4 | 0.065 |
| BDP-23                 | 0.256 | 0.00511 | 4 | 0.850 |
| BDP-24                 | 0.012 | 0.00026 | 4 | 0.529 |
| BDP-25 <sup>test</sup> | 0.188 | 0.00408 | 4 | 0.322 |
| BDP-26                 | 0.036 | 0.00070 | 4 | 0.236 |
| BDP-27                 | 0.144 | 0.00262 | 4 | 3.111 |
| BDP-29                 | 0.185 | 0.00285 | 4 | 2.086 |
| BDP-30                 | 0.226 | 0.00348 | 4 | 1.074 |
| BDP-31                 | 0.188 | 0.00331 | 4 | 0.489 |
| BDP-33                 | 0.208 | 0.00331 | 4 | 1.846 |
| BDP-48 <sup>test</sup> | 0.335 | 0.00516 | 7 | 2.783 |
| BDP-61                 | 0.241 | 0.00360 | 8 | 3.322 |
| BDP-63                 | 0.135 | 0.00178 | 9 | 3.155 |
| BDP-64                 | 0.000 | 0.00000 | 8 | 1.415 |
| BDP-67                 | 0.055 | 0.00073 | 4 | 1.337 |
| BDP-68                 | 0.010 | 0.00013 | 4 | 1.173 |



|                        |       |         |   |       |
|------------------------|-------|---------|---|-------|
| BDP-69                 | 0.199 | 0.00214 | 4 | 1.876 |
| BDP-70                 | 0.136 | 0.00140 | 4 | 1.059 |
| BDP-72                 | 0.240 | 0.00471 | 5 | 1.072 |
| BDP-74 <sup>test</sup> | 0.042 | 0.00048 | 4 | 0.152 |

---

**Table S7.** Values of the most significant descriptors used by Model 5.

| <b>Compound</b>        | <b>F06[N-B]</b> | <b>B05[O-O]</b> | $\frac{Lg \Phi_{Fl}}{Lg \Phi_{\Delta}}$ |
|------------------------|-----------------|-----------------|-----------------------------------------|
| BDP-2                  | 0               | 0               | 0.079                                   |
| BDP-3                  | 0               | 0               | 0.160                                   |
| BDP-4                  | 1               | 0               | 1.468                                   |
| BDP-5 <sup>test</sup>  | 0               | 0               | 0.730                                   |
| BDP-6                  | 0               | 0               | 0.771                                   |
| BDP-7                  | 1               | 0               | 1.074                                   |
| BDP-8 <sup>test</sup>  | 0               | 0               | 0.877                                   |
| BDP-9                  | 0               | 0               | 0.619                                   |
| BDP-10                 | 0               | 0               | 0.328                                   |
| BDP-11                 | 0               | 0               | 0.359                                   |
| BDP-12                 | 0               | 1               | 2.215                                   |
| BDP-13 <sup>test</sup> | 0               | 1               | 2.025                                   |
| BDP-14                 | 0               | 0               | 0.510                                   |
| BDP-15                 | 0               | 0               | 1.905                                   |
| BDP-16 <sup>test</sup> | 0               | 0               | 1.633                                   |
| BDP-17                 | 0               | 0               | 2.129                                   |
| BDP-18                 | 0               | 0               | 2.169                                   |
| BDP-19                 | 0               | 0               | 2.775                                   |
| BDP-20 <sup>test</sup> | 0               | 0               | 1.147                                   |
| BDP-21                 | 0               | 0               | 0.065                                   |
| BDP-23                 | 0               | 0               | 0.850                                   |
| BDP-24                 | 0               | 0               | 0.529                                   |
| BDP-25 <sup>test</sup> | 0               | 0               | 0.322                                   |
| BDP-26                 | 0               | 0               | 0.236                                   |
| BDP-27                 | 0               | 0               | 3.111                                   |
| BDP-29                 | 0               | 0               | 2.086                                   |
| BDP-30                 | 0               | 0               | 1.074                                   |
| BDP-31                 | 0               | 0               | 0.489                                   |
| BDP-33                 | 0               | 0               | 1.846                                   |

|                        |   |   |       |
|------------------------|---|---|-------|
| BDP-48 <sup>test</sup> | 0 | 0 | 2.783 |
| BDP-61                 | 3 | 0 | 3.322 |
| BDP-63                 | 3 | 0 | 3.155 |
| BDP-64                 | 0 | 0 | 1.415 |
| BDP-67                 | 0 | 0 | 1.337 |
| BDP-68                 | 0 | 0 | 1.173 |
| BDP-69                 | 0 | 0 | 1.876 |
| BDP-70                 | 0 | 0 | 1.059 |
| BDP-72                 | 0 | 0 | 1.072 |
| BDP-74 <sup>test</sup> | 0 | 0 | 0.152 |

---

**Table S8.** Most significant descriptors of Model 6.

| <b>Compound</b>        | <b>H2u</b> | <b>P_VSA_LogP_5</b> | $\frac{Lg \Phi_{Fl}}{Lg \Phi_{\Delta}}$ |
|------------------------|------------|---------------------|-----------------------------------------|
| BDP-2                  | 2.052      | 6.371               | 0.079                                   |
| BDP-3                  | 2.763      | 12.740              | 0.160                                   |
| BDP-4                  | 3.021      | 15.500              | 1.468                                   |
| BDP-5 <sup>test</sup>  | 2.998      | 15.500              | 0.730                                   |
| BDP-6                  | 2.736      | 15.500              | 0.771                                   |
| BDP-7                  | 2.994      | 18.260              | 1.074                                   |
| BDP-8 <sup>test</sup>  | 2.674      | 21.360              | 0.877                                   |
| BDP-9                  | 2.732      | 30.840              | 0.619                                   |
| BDP-10                 | 3.480      | 28.990              | 0.328                                   |
| BDP-11                 | 3.712      | 45.230              | 0.359                                   |
| BDP-12                 | 3.734      | 45.230              | 2.215                                   |
| BDP-13 <sup>test</sup> | 3.829      | 61.470              | 2.025                                   |
| BDP-14                 | 3.788      | 61.470              | 0.510                                   |
| BDP-15                 | 3.186      | 18.620              | 1.905                                   |
| BDP-16 <sup>test</sup> | 3.020      | 12.250              | 1.633                                   |
| BDP-17                 | 3.343      | 18.620              | 2.129                                   |
| BDP-18                 | 3.063      | 12.250              | 2.169                                   |
| BDP-19                 | 3.535      | 18.620              | 2.775                                   |
| BDP-20 <sup>test</sup> | 3.435      | 12.250              | 1.147                                   |
| BDP-21                 | 3.506      | 17.890              | 0.065                                   |
| BDP-23                 | 3.153      | 17.890              | 0.850                                   |
| BDP-24                 | 3.056      | 11.520              | 0.529                                   |
| BDP-25 <sup>test</sup> | 3.426      | 14.700              | 0.322                                   |
| BDP-26                 | 3.524      | 21.070              | 0.236                                   |
| BDP-27                 | 3.862      | 23.030              | 3.111                                   |
| BDP-29                 | 3.855      | 29.410              | 2.086                                   |
| BDP-30                 | 3.366      | 29.410              | 1.074                                   |
| BDP-31                 | 3.810      | 28.180              | 0.489                                   |
| BDP-33                 | 3.872      | 33.330              | 1.846                                   |

|                        |       |        |       |
|------------------------|-------|--------|-------|
| BDP-48 <sup>test</sup> | 4.057 | 19.790 | 2.783 |
| BDP-61                 | 3.990 | 22.300 | 3.322 |
| BDP-63                 | 4.118 | 28.240 | 3.155 |
| BDP-64                 | 3.173 | 25.490 | 1.415 |
| BDP-67                 | 4.173 | 33.330 | 1.337 |
| BDP-68                 | 4.026 | 39.700 | 1.173 |
| BDP-69                 | 4.055 | 46.070 | 1.876 |
| BDP-70                 | 3.983 | 56.360 | 1.059 |
| BDP-72                 | 3.220 | 46.990 | 1.072 |
| BDP-74 <sup>test</sup> | 3.818 | 44.840 | 0.152 |

---

## ALE toluene MLR

We applied the accumulated local effects (ALE) methodology to analyze the performance of our ML models in toluene. Figure 1 presents the results for the MLR model (Model 1). The ALE graphs illustrate how local variations in the descriptor values influence the dependent variable  $yyy$ . The slope coefficients of the graphs match those from the MLR method, confirming that the linear model accurately captures linear dependencies. The interpretation of the ALE plot is that the ALE value for a given feature represents the deviation from the average effect of that feature. In other words, the ALE value reflects the relative impact of that feature on the prediction at a specific feature value.

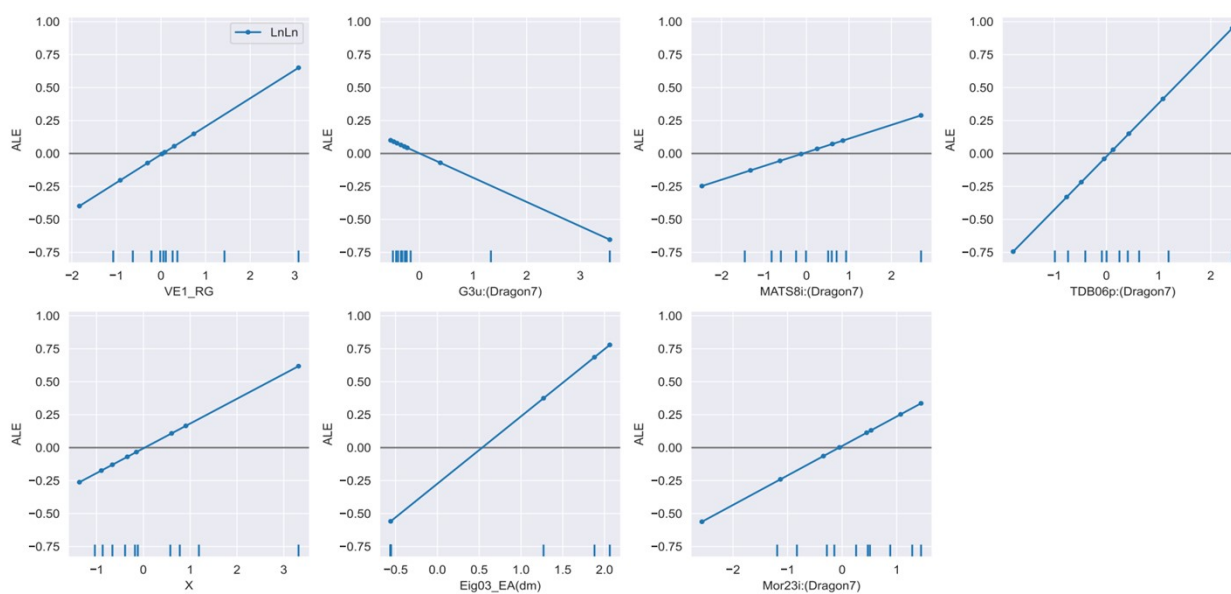

**Figure S1.** ALE plots for the MLR method for molecules studied in toluene.

ALE graphs for Model 1 are linear and the slope coefficient of each graph coincides with the coefficient obtained in the MLR method. This indicates that Model 1 works correctly and accurately describes all linear dependencies.

## RFR

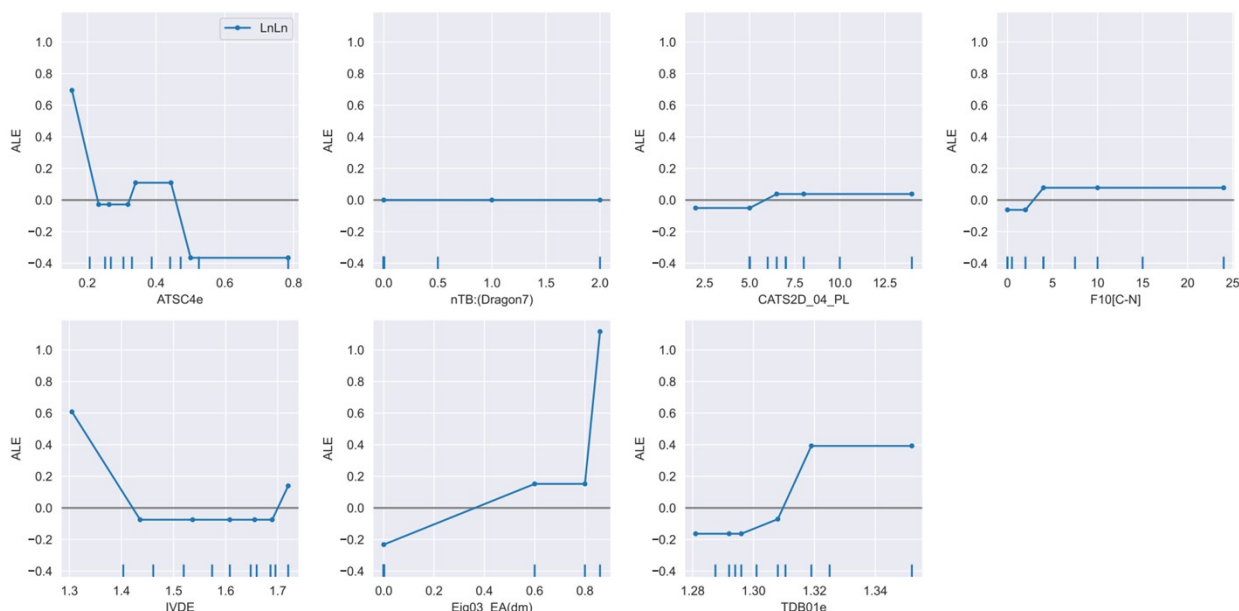

**Figure S2.** ALE plots for the RFR model (Model 2) in toluene.

The results of the ALE methodology for the RFR model (Model 2) built for toluene are presented in Figure S2. The graphs indicate that the descriptors ATSC4e, Eig03\_EA(dm), and TDB01e have the strongest impact on the model. As the value of the ATSC4e descriptor increases, the dependent variable decreases. The Eig03\_EA(dm) descriptor causes a monotonic increase in the dependent variable  $y$ , with a sharp jump occurring between values 0.6 and 0.8. Similarly, the TDB01e descriptor also has a monotonic effect on  $y$  up to a value of 1.32, after which it no longer influences  $y$ . The remaining descriptors have minimal impact, as indicated by their relative contributions.

## SVR

The results of the ALE methodology for the SVR model (Model 3) built for toluene are presented in Figure S3. This model uses a linear kernel, and all ALE dependencies are linear. The slope coefficients of the graphs correspond to the relative significance of the descriptors. Only the G3u descriptor is inversely proportional to the dependent variable  $y$ , while the other descriptors are directly proportional to  $y$ .

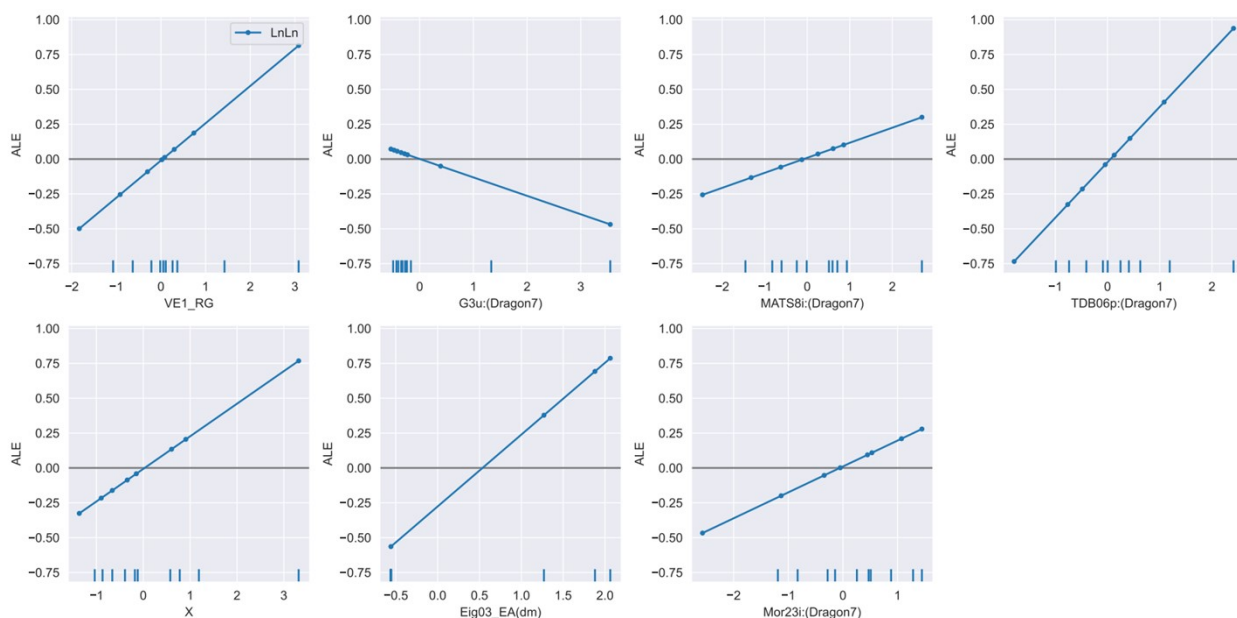

**Figure S3.** ALE plots for the SVR Model 6 in toluene.

### Acetonitrile MLR

We also applied the ALE methodology to evaluate the significance of descriptors in our acetonitrile ML models. Similar to the other linear regression model (Model 1), in the case of Model 4, the ALE graphs are linear, and the slope coefficients of each graph align with the coefficients obtained from the MLR method. The results of the ALE methodology for the MLR model in acetonitrile (Model 4) are presented in Figure S4.

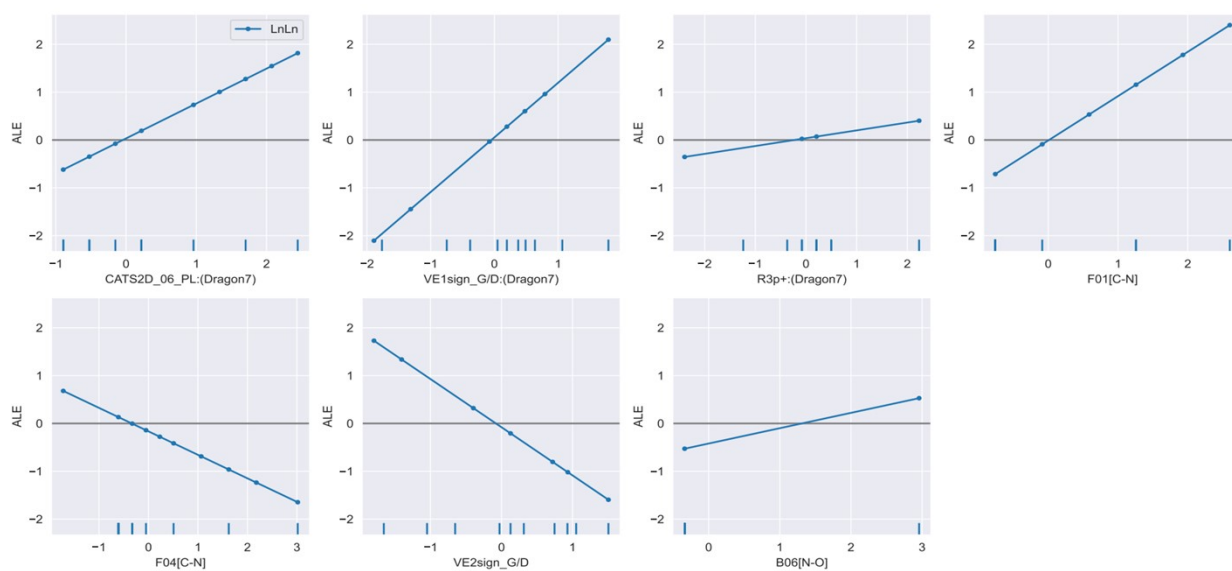

**Figure S4.** ALE plots for the MLR method for molecules studied in acetonitrile.

The increment of descriptors F04[C-N] and VE2sign\_G/D leads to a decrease of the dependent parameter  $y$ , whereas the increment of other descriptors leads to an increase of the dependent variable  $y$ .



The results of the ALE method for the RFR model in acetonitrile are presented in Figure S5. The graphs confirm that the descriptors H2u, P\_VSA\_LogP\_5, and F01[C-N] are the most influential. Analyzing these ALE plots reveals how different attributes nonlinearly affect the predictions of the random forest model. The increase in the F01[C-N] descriptor up to a value of 7 leads to a rise in the dependent variable yyy, after which it ceases to have an effect. The increase in the most significant descriptor, H2u, up to a value of 3.2 also causes a rise in the dependent variable, followed by a sharp decline at 3.5 and then an increase up to 4. The P\_VSA\_LogP\_5 descriptor, on the other hand, monotonically decreases the dependent variable.

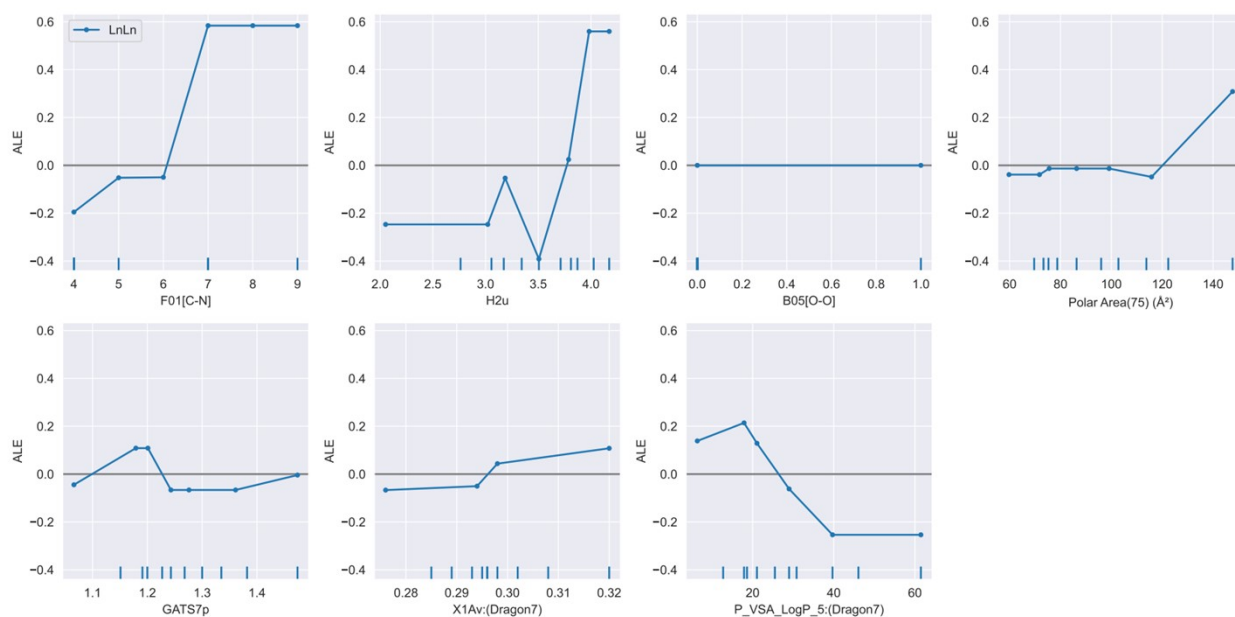

**Figure S5.** ALE plots for the RFR method for molecules dissolved in acetonitrile.

### SVR

The results of the ALE method for the SVR model developed for acetonitrile are presented in Figure S6. The graphs show that all dependencies are linear. Since the model uses a linear kernel, Model 6 does not account for non-linear dependencies. As the values of the descriptors LDI, F04[C-B], and LLS\_02 increase, the dependent variable yyy decreases. The remaining descriptors cause yyy to increase as their values increase.

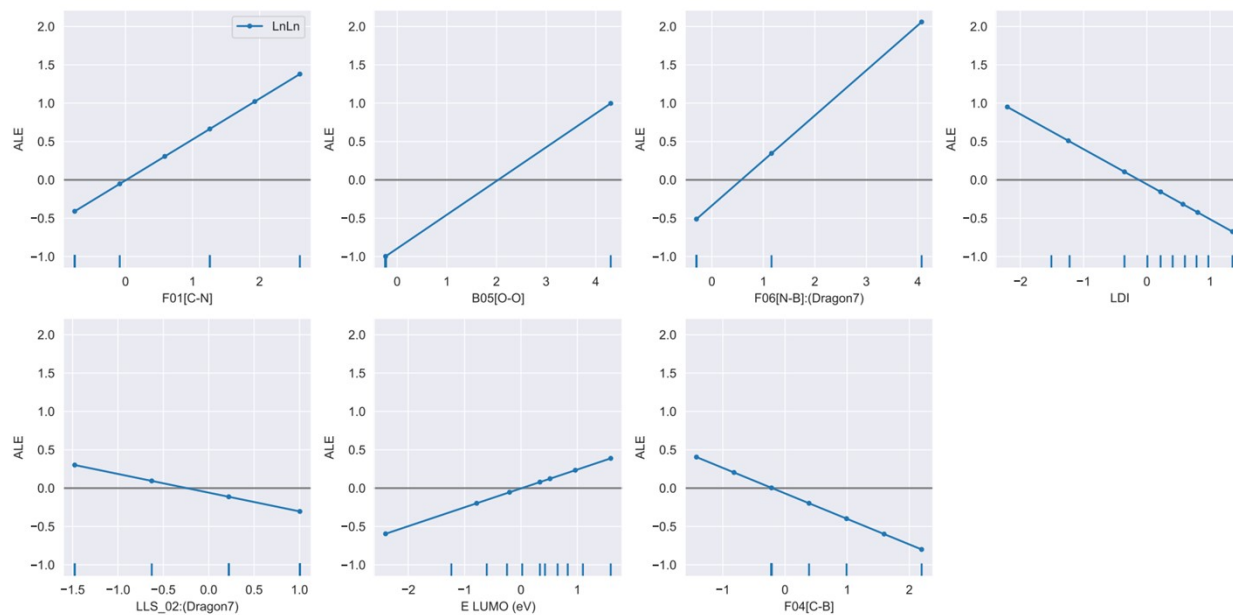

**Figure S6.** ALE plots for the SVR method for molecules studied in acetonitrile.

## SHAP toluene MLR

We used the SHAP methodology to evaluate the contribution of descriptors to our QSPR models. SHAP (Shapley additive explanations) is a theoretical approach for interpreting the results of any ML model. SHAP combines optimal credit allocation with local explanations by using traditional Shapley values from game theory and their related applications. Specifically, we applied SHAP to analyze the performance of our QSPR models for molecules dissolved in toluene. Figure S7 presents the SHAP results for the MLR Model 1 in toluene. The distribution of SHAP values and their relationship with actual feature values are depicted using the color bar on the right. According to SHAP, the Eig03\_EA(dm) descriptor is the main contributor with the highest impact on the model output.

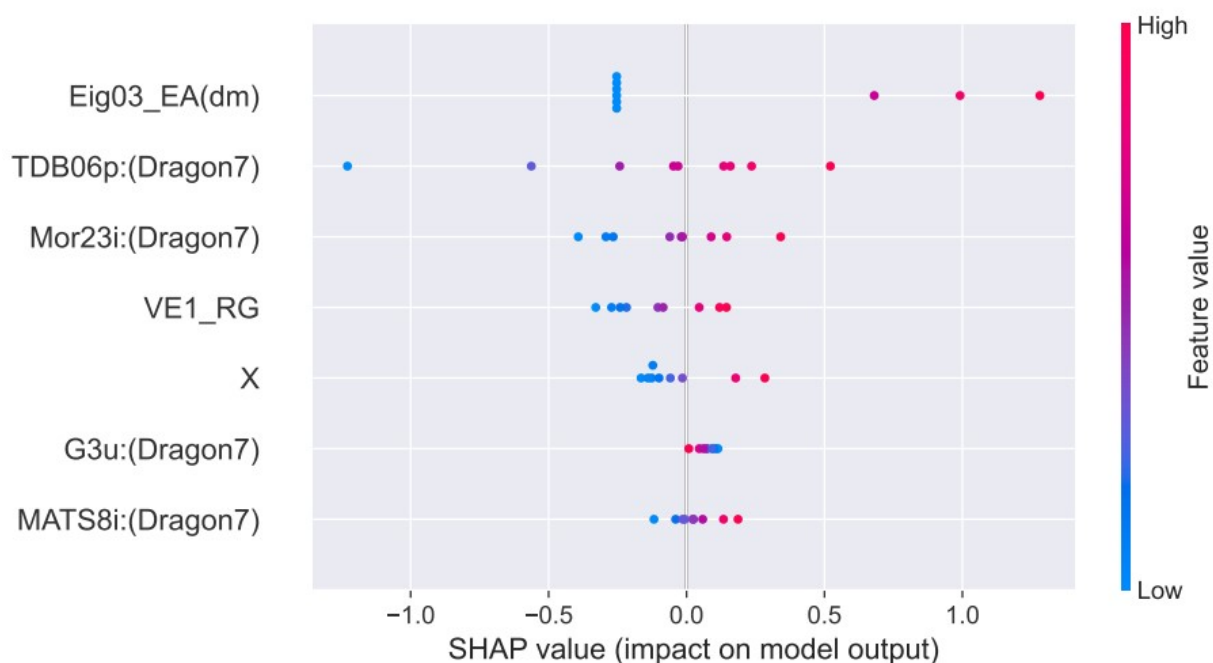

**Figure S7.** Beeswarm plot of SHAP values generated using the MLR Model 1 developed for toluene.

## RFR

The results of the SHAP methodology applied to the RFR Model 2 for toluene are presented in Figure S8. The highest contribution is observed for the Eig03\_EA(dm) descriptor, which is similar to Model 1 (toluene, MLR).

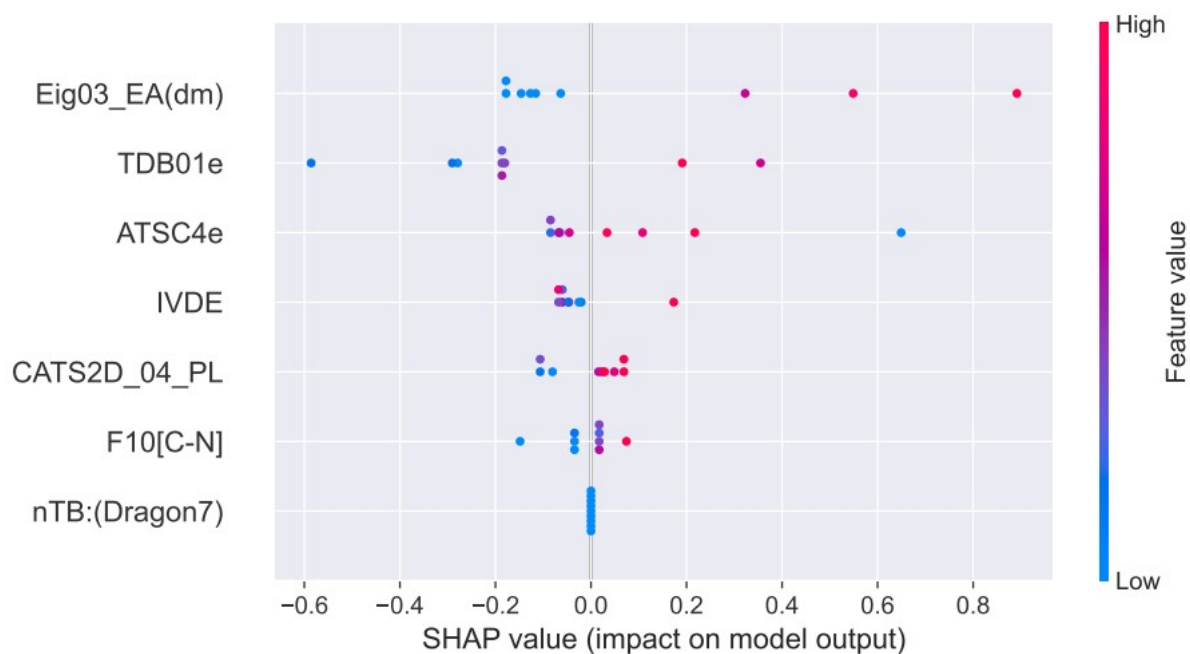

**Figure S8.** Summary plot of SHAP values generated from the test dataset using the RFR model developed for toluene-extracted molecules.

### SVR

Application of SHAP methodology to SVR Model 3 in toluene is presented on Figure S9. The predominant descriptor is Eig03\_EA(dm).

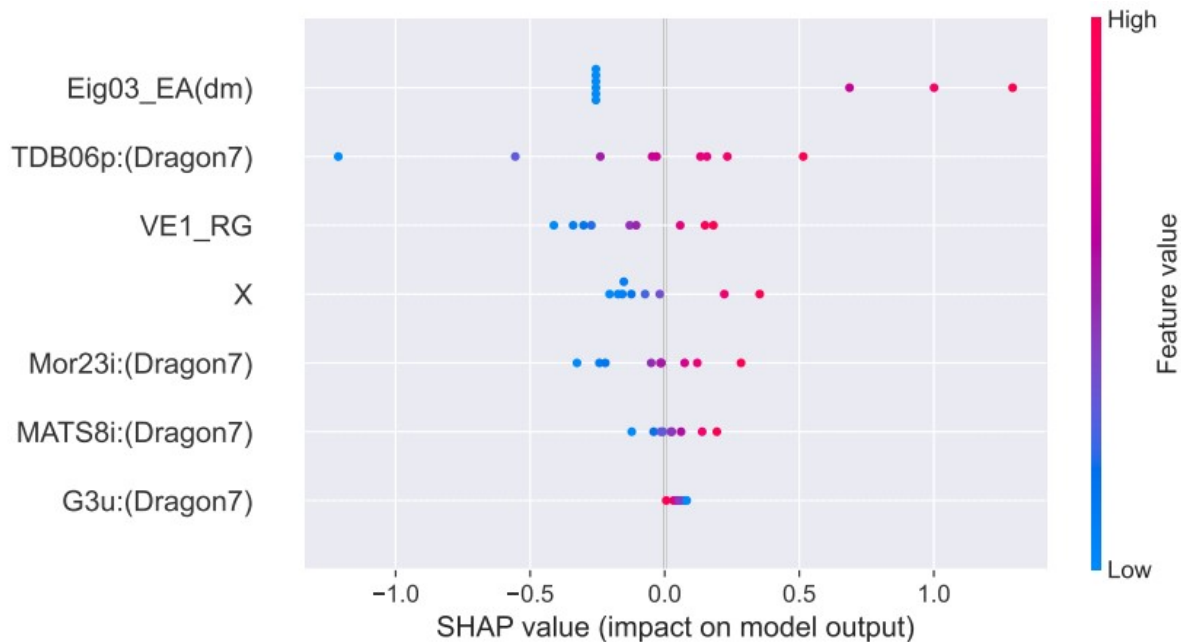

**Figure S9.** Beeswarm plot of SHAP values generated using the SVR method for toluene.

### Acetonitrile MLR

The results of the SHAP method for the MLR Model 4 in acetonitrile are presented in Figure S10. The main contributors of Model 4 are VE1sign\_G/D (directly proportional to the

dependent variable  $y$ ), VE2sing\_G/D (inversely correlated with  $y$ ) and F01[C-N] (directly proportional to  $y$ ).

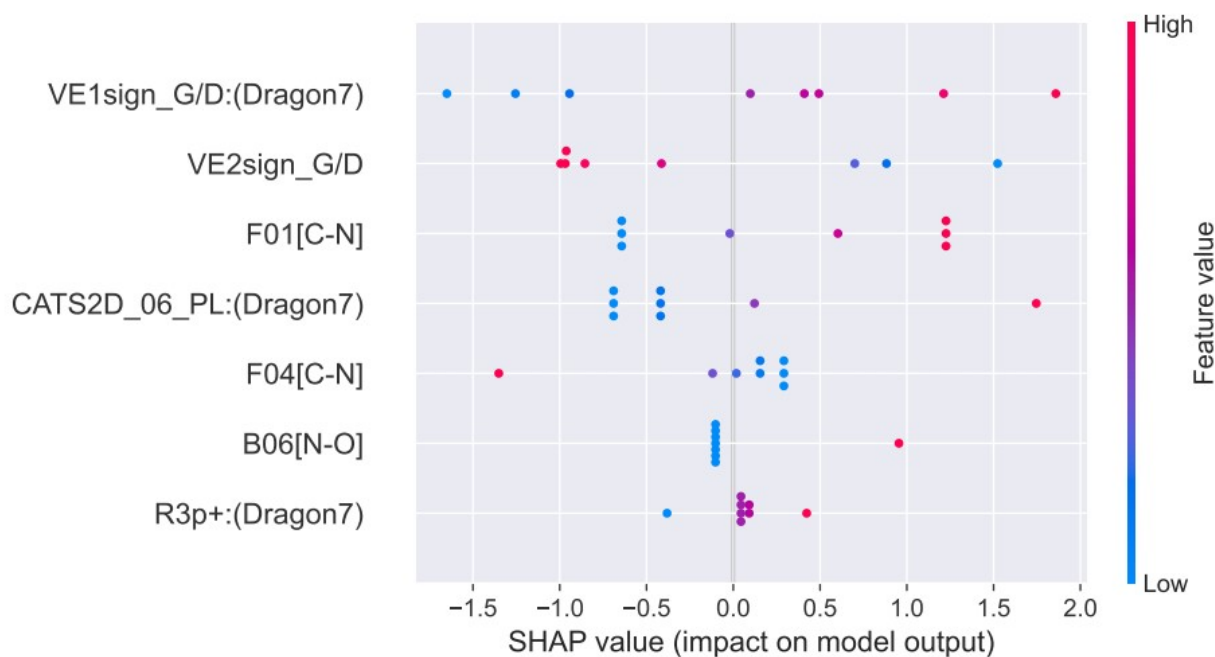

**Figure S10.** Summary plot of SHAP values generated from the test dataset using the MLR model developed for acetonitrile-extracted molecules.

### RFR

The results of the SHAP method for the RFR Model 5 in acetonitrile are presented in Figure S11. According to SHAP, the major contributions are made by H2u and F01[C-N] descriptors, both of which are directly proportional to the dependent variable  $y$ .

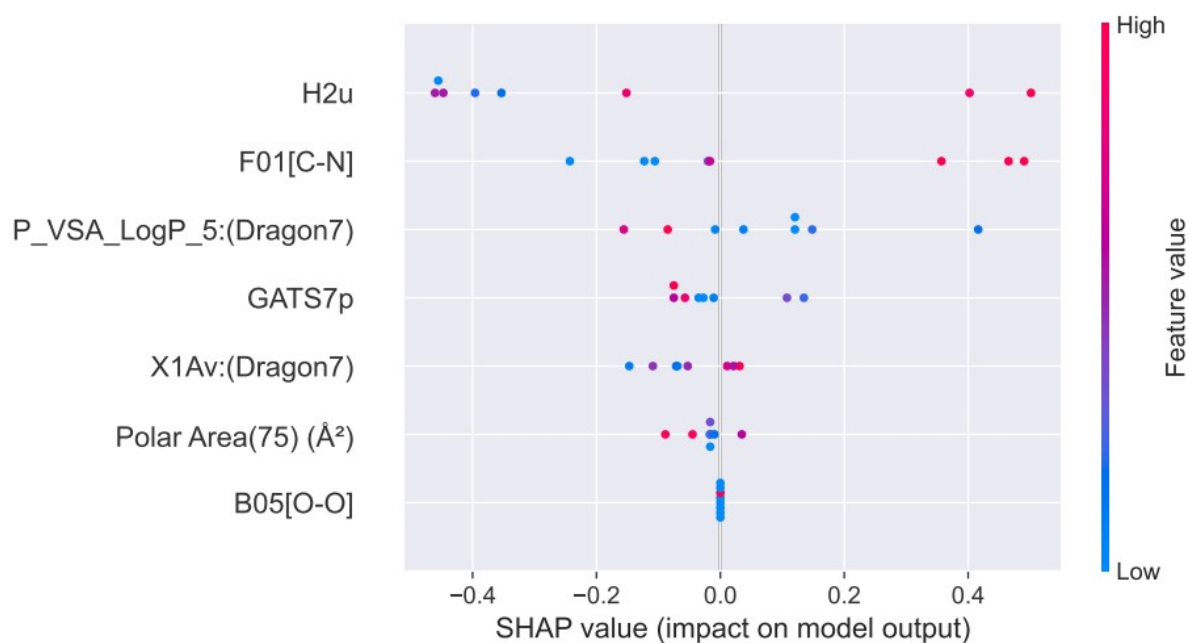

**Figure S11.** Summary plot of SHAP values generated using the RFR model in acetonitrile.

## SVR

The results of the SHAP method for the SVR Model 6 developed for acetonitrile are presented in Figure S12. According to SHAP, the major contributor is the LDI descriptor, which is inversely correlated with the dependent variable  $y$ .

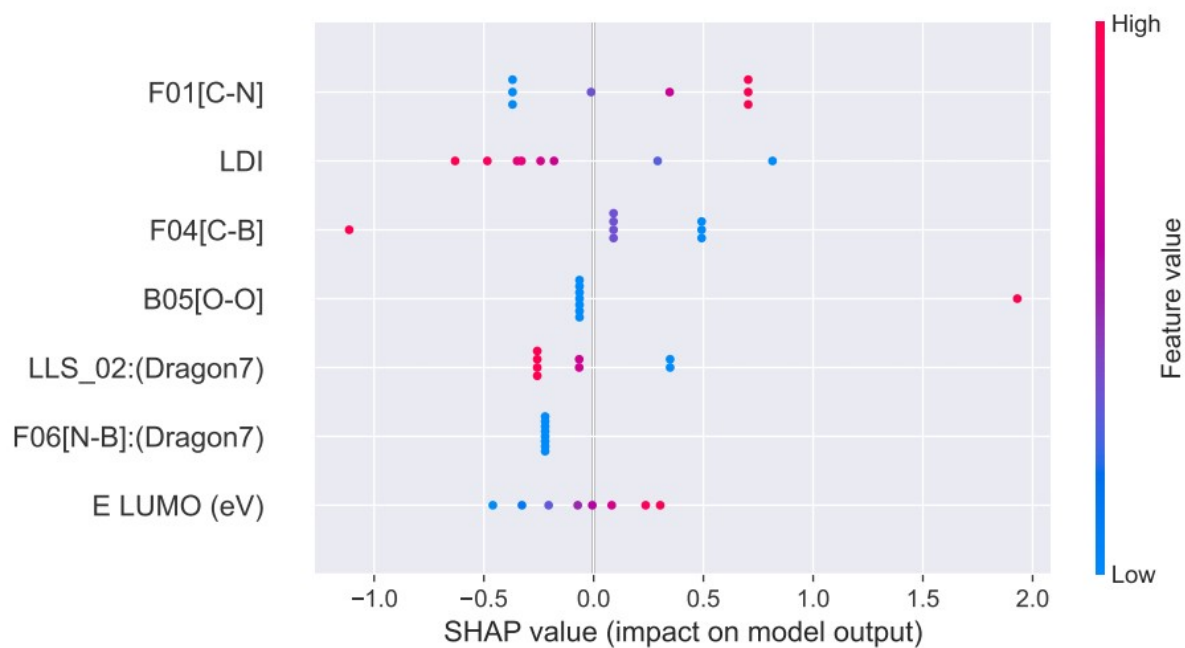

**Figure S12.** Beeswarm visualization of SHAP generated using the SVR Model 6 developed for acetonitrile.

## References

---

- <sup>1</sup> X.-F. Zhang, J. Zhu, *J. Luminescence*, 2019, **205**, 148-157.
- <sup>2</sup> X.-F. Zhang, N. Feng, *Spectrochim. Acta A*, 2018, **189**, 13-21.
- <sup>3</sup> W. Hu, M. Liu, X.-F. Zhang, Y. Wang, Y. Wang, H. Lan, H. Zhao, *J. Phys. Chem. C*, 2019, **123**, 15944-15944.
- <sup>4</sup> X.-F. Zhang, N. Feng, *Chem. Asian J.*, 2017, **12**, 2447-2456.
- <sup>5</sup> W. Hu, Y. Lin, X.-F. Zhang, M. Feng, S. Zhao, J. Zhang, *Dyes Pigm.*, 2019, **164**, 139-147.
- <sup>6</sup> W. Hu, X.-F. Zhang, X. Lu, S. Lan, D. Tian, T. Li, L. Wang, S. Zhao, M. Feng, J. Zhang, *J. Lumin.*, 2018, **194**, 185-192.
- <sup>7</sup> W. Hu, X.-F. Zhang, X. Lu, S. Lan, D. Tian, T. Li, L. Wang, S. Zhao, M. Feng, J. Zhang, *Dyes Pigm.*, 2018, **149**, 306-314.
- <sup>8</sup> M. A. Filatov, S. Karuthedath, P. M. Polestshuk, S. Callaghan, K. J. Flanagan, M. Telitchko, T. Wiesner, F. Laquai, M. O. Senge, *Phys. Chem. Chem. Phys.*, 2018, **20**, 8016-8031.
- <sup>9</sup> Z. Wang, J. Zhao, *Org. Lett.*, 2017, **19**, 4492-4495.
- <sup>10</sup> M. A. Filatov, S. Karuthedath, P. M. Polestshuk, S. Callaghan, K. Flanagan, T. Wiesner, F. Laquai, M. O. Senge, *ChemPhotoChem*, 2018, **2**, 606-615.
- <sup>11</sup> Z. Wang, M. Ivanov, Y. Gao, L. Bussotti, P. Foggi, H. Zhang, N. Russo, B. Dick, J. Zhao, M. Di Donato, G. Mazzone, L. Luo, M. Fedin, *Chem. Eur. J.*, 2020, **26**, 1091-1102.
- <sup>12</sup> Z. Wang, J. Zhao, M. Di Donato, G. Mazzone, *Chem. Commun.*, 2019, **55**, 1510-1513.
- <sup>13</sup> K. Chen, W. Yang, Z. Wang, A. Iagatti, L. Bussotti, P. Foggi, W. Ji, J. Zhao, M. Di Donato, *J. Phys. Chem. A*, 2017, **121**, 7550-7564.
- <sup>14</sup> Y. Dong, A. A. Sukhanov, J. Zhao, A. Elmali, X. Li, B. Dick, A. Karatay, V.K. Voronkova, *J. Phys. Chem. C*, 2019, **123**, 22793-22811.
- <sup>15</sup> Y. Dong, A. Elmali, J. Zhao, B. Dick, A. Karatay, *ChemPhysChem*, 2020, **21**, 1388-1401.
- <sup>16</sup> K. Chen, M. Taddei, L. Bussotti, P. Foggi, J. Zhao, M. Di Donato, *ChemPhotoChem*, 2020, **4**, 487-501.
- <sup>17</sup> Y. Hou, I. Kurganskii, A. Elmali, H. Zhang, Y. Gao, L. Lv, J. Zhao, A. Karatay, L. Luo, M. Fedin, *J. Chem. Phys.*, 2020, **152**, 114701.
- <sup>18</sup> V.-N. Nguyen, Y. Yim, S. Kim, B. Ryu, K. M. K. Swamy, G. Kim, N. Kwon, C.-Y. Kim, S. Park, J. Yoon, *Angew. Chem. Int. Ed.*, 2020, **59**, 8957-8962.
- <sup>19</sup> B. Ventura, G. Marconi, M. Bröring, R. Krüger, L. Flamigni, *New J. Chem.*, 2009, **33**, 428-438.
- <sup>20</sup> L. Ya, J. Zhao, A. Iagatti, L. Bussotti, P. Foggi, E. Castellucci, M. Di Donato, K. Han, *J. Phys. Chem. C*, 2018, **122**, 2502-2511.
- <sup>21</sup> N. Epelde-Elezcano, E. Palao, H. Manzano, A. Prieto-CastaCeda, A.R. Agarrabeitia, A. Tabero, A. Villanueva, S. de la Moya, C. Ljpez-Arbeloa, V. Martinez-Martinez, M.J. Ortiz, *Chem. Eur. J.*, 2017, **23**, 4837-4848.
- <sup>22</sup> Y. Hu, Y. Hou, Z. Wang, Y. Li, J. Zhao, *J. Chem. Phys.*, 2020, **153**, 224304.
- <sup>23</sup> T. Mikulchyk, S. Karuthedath, C. S. P. De Castro, A. A. Buglak, A. Sheehan, A. Wieder, F. Laquai, I. Naydenova, M. A. Filatov, *J. Matter. Chem. C*, 2022, **10**, 11588-11597.
- <sup>24</sup> Y. Dong, M. Taddei, S. Doria, L. Bussotti, J. Zhao, G. Mazzone, M. Di Donato, *J. Phys. Chem. B*, 2021, **125**, 4779-4793.
- <sup>25</sup> Y. Yan, A. A. Sukhanov, M. H. E. Bousquet, Q. Guan, J. Zhao, V. K. Voronkova, D. Escudero, A. Barbon, Y. Xing, G. G. Gurzadyan, D. Jacquemin, *J. Phys. Chem. B*, 2021, **125**, 6280-6295.
